# Supplementary material for: The behavior of the aluminum trimer when combining with different superatom clusters
Source: Royal Society of Chemistry journal article supplement (doi:10.1039/c7ra12852e), 2018-01-01
Supplement: c7ra12852e1.pdf [file c7ra12852e1.pdf]

Supporting Information available for:

**The behavior of the Aluminum Trimer when Combining with  
Different Superatom Clusters**

Hui Yang<sup>a,b</sup>, Di Wu<sup>a</sup>, Hui-Min He<sup>a</sup>, Dan Yu<sup>a</sup>, Ying Li<sup>\*a</sup>, Zhi-Ru Li<sup>a</sup>

<sup>a</sup> *Institute of Theoretical Chemistry, Jilin University, Changchun 130023, (P. R. China) E-mail: [liyingedu@jlu.edu.cn](mailto:liyingedu@jlu.edu.cn)*

<sup>b</sup> *School of Chemistry and Chemical Engineering, Shanxi Datong University, Datong 037009, (P. R. China)*

## 1. Figures and Tables

**Figure S1.** The valence molecular orbitals of  $\mathbf{IIfs}$ , which originates from (a)  $\text{Al}_3^-$  and (b)  $\text{FLi}_2^+$  subunits, respectively.

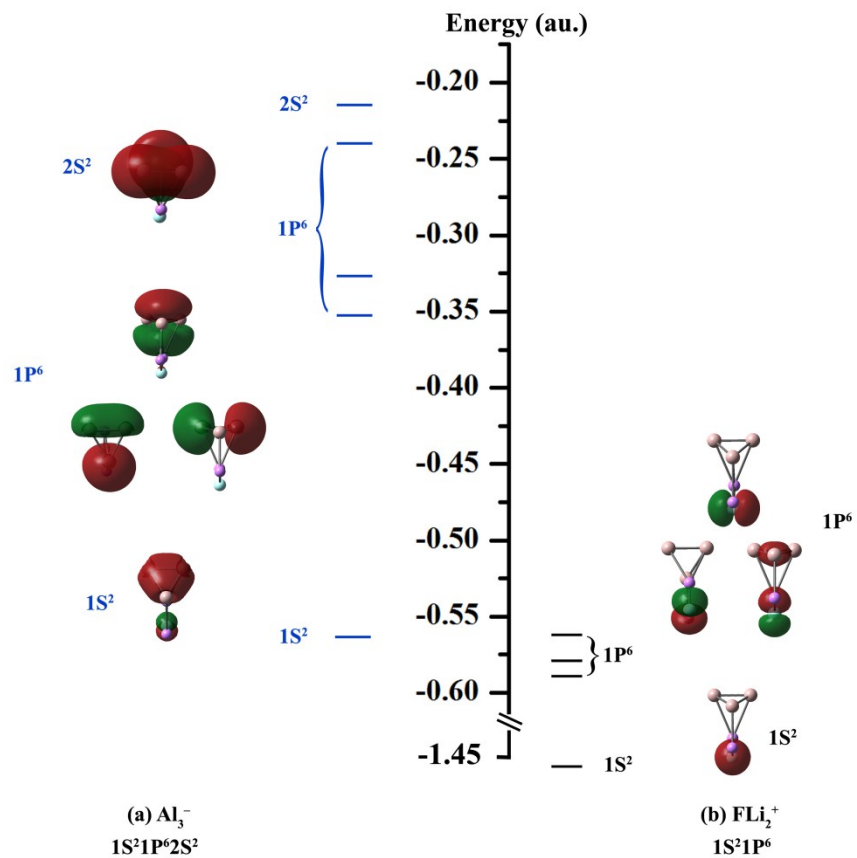

**Figure S2.** Optimized structures of the  $\text{Al}_3\text{-BF}_4$  (**4ps**) and  $\text{Al}_3\text{-NLi}_4$  (**IV-24**) compounds at the MP2/6-311+G(3df) level in solvent and gas phase, respectively. Bond lengths ( $\text{\AA}$ ) and Laplacian of the electron density at a bond critical point  $\nabla^2\rho(r)$  (in au., bold font) that connects  $\text{Al}_3$  and  $\text{BF}_4/\text{NLi}_4$  subunits.

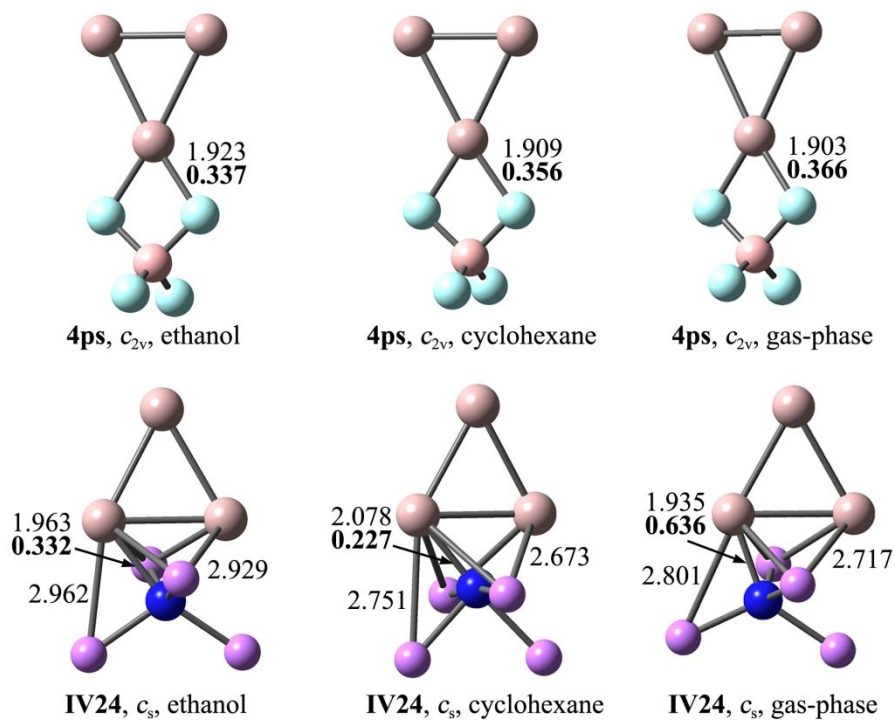

**Figure S3.** The characteristic vibration mode of the (a)  $\text{Al}_3\text{-BF}_4$  (**4ps**) and (b)  $\text{Al}_3\text{-NLi}_4$  (**IV-24**) compounds in solvents and gas phase, respectively.

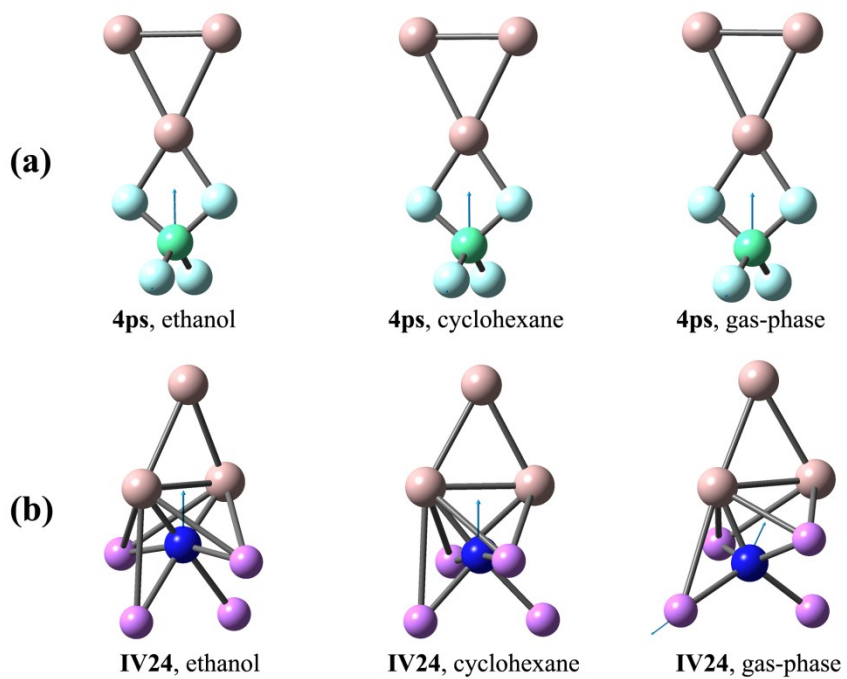

**Figure S4.** Valence molecular orbitals of  $\text{Al}_3^+$  and  $\text{Al}_3^-$  ions.

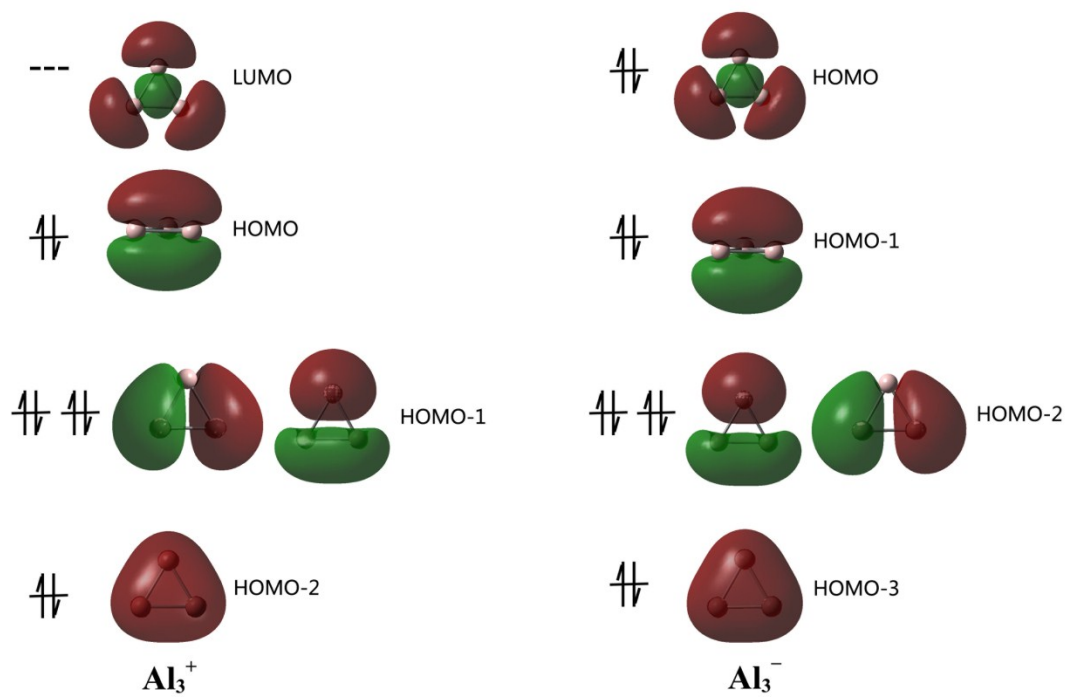

**Table S1.** The hardness ( $\eta$ , in eV) of the most stable  $\text{Al}_3\text{-X}$  and  $\text{Al}_3\text{-M}$  compounds.

| species                    |                | $\eta$ |
|----------------------------|----------------|--------|
| $\text{Al}_3\text{-F}$     | <b>1pp</b>     | 2.532  |
| $\text{Al}_3\text{-LiF}_2$ | <b>2ps-1</b>   | 2.472  |
| $\text{Al}_3\text{-BeF}_3$ | <b>3ps-1</b>   | 2.561  |
| $\text{Al}_3\text{-BF}_4$  | <b>4ps</b>     | 2.569  |
| $\text{Al}_3\text{-Li}$    | <b>Ifp</b>     | 2.513  |
| $\text{Al}_3\text{-FLi}_2$ | <b>Iifs</b>    | 2.436  |
| $\text{Al}_3\text{-OLi}_3$ | <b>III24-1</b> | 2.004  |
| $\text{Al}_3\text{-NLi}_4$ | <b>IV24</b>    | 1.959  |

**Table S2.** Relative energies  $E_{\text{rel}}$  (kcal/mol), the lowest vibrational frequency  $\nu_1$  ( $\text{cm}^{-1}$ ), the characteristic vibrational frequency  $\nu$  ( $\text{cm}^{-1}$ ) and corresponding IR intensity (km/mol), NBO charge on the  $\text{Al}_3$  subunit ( $Q^{\text{Al}_3}$ , |e|), HOMO-LUMO gaps (eV), binding energy per atom  $E_a$  (kcal/mol), bond energies  $E_b$  (kcal/mol), and the maximum negative NICS values ( $\text{NICS}_{\text{max}}$ , ppm) of the **4ps** and **IV-24** compounds.

| Species                    |              | solvent     | orientation   | $\nu_1$ | $\nu$  | intensity | $Q^{\text{Al}_3}$ | gap  | $E_a$ | $E_b$ | $\text{NICS}_{\text{max}}$ |
|----------------------------|--------------|-------------|---------------|---------|--------|-----------|-------------------|------|-------|-------|----------------------------|
| $\text{Al}_3\text{-BF}_4$  | <b>4ps</b>   | ethanol     | point-to-side | 20      | 1092.7 | 924.4     | 0.768             | 6.02 | 86.5  | 168.1 | -30.0                      |
|                            |              | cyclohexane | point-to-side | 27      | 1108.6 | 805.0     | 0.762             | 5.79 | 86.7  | 167.0 | -30.4                      |
|                            |              | gap-phase   | point-to-side | 38      | 1121.4 | 711.2     | 0.757             | 5.68 | 86.9  | 166.4 | -40.3                      |
| $\text{Al}_3\text{-NLi}_4$ | <b>IV-24</b> | ethanol     | side-to-face  | 101     | 636.5  | 1717.2    | -0.559            | 4.65 | 60.9  | 176.0 | -24.0                      |
|                            |              | cyclohexane | side-to-face  | 78      | 592.5  | 825.0     | -0.737            | 4.35 | 55.0  | 116.0 | -24.9                      |
|                            |              | gap-phase   | side-to-face  | 24      | 646.9  | 208.0     | -0.361            | 4.11 | 54.1  | 94.7  | -28.5                      |

**Table S3.** Location of the maximum negative NICS value of the Al<sub>3</sub>-X compounds.

| species                           |              | Location                                                                                         |
|-----------------------------------|--------------|--------------------------------------------------------------------------------------------------|
| Al <sub>3</sub> -F                | <b>1pp</b>   | geometrical center of the Al <sub>3</sub> ring                                                   |
|                                   | <b>1sp</b>   | geometrical center of the Al <sub>3</sub> ring                                                   |
| Al <sub>3</sub> -LiF <sub>2</sub> | <b>2ps-1</b> | geometrical center of the Al <sub>3</sub> ring                                                   |
|                                   | <b>2ss</b>   | geometrical center of the Al <sub>3</sub> ring                                                   |
| Al <sub>3</sub> -BeF <sub>3</sub> | <b>3ps-1</b> | geometrical center of the Al <sub>3</sub> ring                                                   |
|                                   | <b>3ps-2</b> | geometrical center of the Al <sub>3</sub> ring                                                   |
|                                   | <b>3ss</b>   | geometrical center of the Al <sub>3</sub> ring                                                   |
|                                   | <b>3ff</b>   | 0.6 Å below (toward BeF <sub>3</sub> subunit) the geometrical center of the Al <sub>3</sub> ring |
| Al <sub>3</sub> -BF <sub>4</sub>  | <b>4ps</b>   | geometrical center of the Al <sub>3</sub> ring                                                   |
|                                   | <b>4ff</b>   | 0.3 Å below (toward BF <sub>4</sub> subunit) the geometrical center of the Al <sub>3</sub> ring  |



**Table S4.** Location of the maximum negative NICS value of the Al<sub>3</sub>-M compounds.

| species                           |                | Location                                                                                         |
|-----------------------------------|----------------|--------------------------------------------------------------------------------------------------|
| Al <sub>3</sub> -Li               | <b>Ifp</b>     | geometrical center of the Al <sub>3</sub> ring                                                   |
|                                   | <b>Ipp</b>     | geometrical center of the Al <sub>3</sub> ring                                                   |
| Al <sub>3</sub> -FLi <sub>2</sub> | <b>Iifs</b>    | 0.3 Å up (away from FLi <sub>2</sub> subunit) the geometrical center of the Al <sub>3</sub> ring |
|                                   | <b>Iiss</b>    | geometrical center of the Al <sub>3</sub> Li <sub>2</sub> cage                                   |
| Al <sub>3</sub> -OLi <sub>3</sub> | <b>III24-1</b> | geometrical center of the Al <sub>3</sub> ring                                                   |
|                                   | <b>III24-2</b> | geometrical center of the Al <sub>3</sub> Li <sub>2</sub> cage                                   |
|                                   | <b>IIIifs</b>  | 0.3 Å up (away from OLi <sub>3</sub> subunit) the geometrical center of the Al <sub>3</sub> ring |
| Al <sub>3</sub> -NLi <sub>4</sub> | <b>IV24</b>    | geometrical center of the Al <sub>3</sub> ring                                                   |
|                                   | <b>IVifs</b>   | geometrical center of the Al <sub>3</sub> ring                                                   |

**2. Cartesian coordinates and electronic states for the Al<sub>3</sub>-X and Al<sub>3</sub>-M compounds at the MP2/6-311+G(3df) level**

**(1) Al<sub>3</sub>-X compounds**

Al<sub>3</sub>-F **1pp** with C<sub>2v</sub> symmetry, 1-A1

|    |             |            |             |
|----|-------------|------------|-------------|
| Al | 0.00000000  | 0.00000000 | 0.00000000  |
| Al | 0.00000000  | 0.00000000 | 2.55821600  |
| Al | 2.12500400  | 0.00000000 | 1.42437000  |
| F  | -0.78448400 | 0.00000000 | -1.47024400 |

Al<sub>3</sub>-F **1sp** with C<sub>2v</sub> symmetry, 1-A1

|    |            |             |             |
|----|------------|-------------|-------------|
| Al | 0.00000000 | 1.37416900  | -0.34615100 |
| Al | 0.00000000 | -1.37416900 | -0.34615100 |
| Al | 0.00000000 | 0.00000000  | 1.82916300  |
| F  | 0.00000000 | 0.00000000  | -1.64213400 |

Al<sub>3</sub>-LiF<sub>2</sub> **2ps-1** with C<sub>2v</sub> symmetry, 1-A1

|    |            |            |             |
|----|------------|------------|-------------|
| Al | 0.00000000 | 0.00000000 | 0.00000000  |
| Al | 0.00000000 | 0.00000000 | 2.39292000  |
| Al | 2.30888800 | 0.00000000 | 1.19646000  |
| Li | 4.93796800 | 0.00000000 | 1.19646000  |
| F  | 3.63804400 | 0.00000000 | -0.02224200 |
| F  | 3.63804400 | 0.00000000 | 2.41516200  |

Al<sub>3</sub>-LiF<sub>2</sub> **2ss** with C<sub>2v</sub> symmetry, 1-A'

|    |            |            |             |
|----|------------|------------|-------------|
| Al | 0.00000000 | 0.00000000 | 0.00000000  |
| Al | 0.00000000 | 0.00000000 | 2.51912300  |
| Al | 2.18976000 | 0.00000000 | 1.27377600  |
| F  | 0.54811000 | 0.00000000 | -1.70770000 |
| F  | 3.40321200 | 0.00000000 | -0.04691200 |
| Li | 2.37863600 | 0.00000000 | -1.57008800 |

Al<sub>3</sub>-LiF<sub>2</sub> **2ps-2** with C<sub>s</sub> symmetry, 1-A'

|    |             |             |            |
|----|-------------|-------------|------------|
| Al | 0.00000000  | 0.00000000  | 0.00000000 |
| Al | 0.00000000  | 0.00000000  | 3.19113300 |
| Al | 2.12356700  | 0.00000000  | 1.80171000 |
| Li | -2.13782600 | 0.00000000  | 4.68895500 |
| F  | -1.06499400 | -1.23265400 | 3.94468400 |
| F  | -1.06499400 | 1.23265400  | 3.94468400 |

Al<sub>3</sub>-BeF<sub>3</sub> **3ps-1** with C<sub>2v</sub> symmetry, 1-A1

|    |             |            |            |
|----|-------------|------------|------------|
| Al | 0.00000000  | 0.00000000 | 0.00000000 |
| Al | 0.00000000  | 0.00000000 | 2.56747500 |
| Al | 2.12578200  | 0.00000000 | 1.12769100 |
| F  | -1.84718500 | 0.00000000 | 6.04955800 |
| Be | -1.19474100 | 0.00000000 | 4.81965100 |
| F  | -1.70956200 | 0.00000000 | 3.35620800 |
| F  | 0.30564100  | 0.00000000 | 4.42523900 |

Al<sub>3</sub>-BeF<sub>3</sub> **3ps-2** with C<sub>2v</sub> symmetry, 1-A1

|    |             |             |             |
|----|-------------|-------------|-------------|
| Al | 0.00000000  | 0.00000000  | 0.19960600  |
| Al | 0.00000000  | 1.20007000  | 2.45598600  |
| Al | 0.00000000  | -1.20007000 | 2.45598600  |
| F  | 0.00000000  | 0.00000000  | -3.74389600 |
| F  | -1.13689300 | 0.00000000  | -1.29700600 |
| Be | 0.00000000  | 0.00000000  | -2.35233600 |
| F  | 1.13689300  | 0.00000000  | -1.29700600 |

Al<sub>3</sub>-BeF<sub>3</sub> **3ss** with C<sub>2v</sub> symmetry, 1-A1

|    |            |            |            |
|----|------------|------------|------------|
| Al | 0.00000000 | 0.00000000 | 0.00000000 |
| Al | 0.00000000 | 0.00000000 | 2.59820300 |

|    |            |            |            |
|----|------------|------------|------------|
| Al | 2.21790400 | 0.00000000 | 1.35335100 |
| F  | 3.14448700 | 0.00000000 | 3.01645500 |
| F  | 0.93703700 | 0.00000000 | 4.25543900 |
| Be | 2.47135700 | 0.00000000 | 4.40312300 |
| F  | 3.15380000 | 0.00000000 | 5.61900400 |

Al<sub>3</sub>-BeF<sub>3</sub> **3ff** with C<sub>3v</sub> symmetry, 1-A1

|    |            |            |            |
|----|------------|------------|------------|
| Al | 0.00000000 | 0.00000000 | 0.00000000 |
| Al | 0.00000000 | 0.00000000 | 2.77043300 |
| Al | 2.39926600 | 0.00000000 | 1.38521500 |
| F  | 2.33460700 | 1.97150600 | 1.38521600 |
| F  | 0.03233000 | 1.97150600 | 2.71443700 |
| F  | 0.03233000 | 1.97150600 | 0.05599600 |
| Be | 0.79975500 | 1.86919000 | 1.38521600 |

Al<sub>3</sub>-BF<sub>4</sub> **4ps** with C<sub>2v</sub> symmetry, 1-A1

|    |             |             |            |
|----|-------------|-------------|------------|
| Al | 0.00000000  | 0.00000000  | 0.00000000 |
| Al | 0.00000000  | 0.00000000  | 2.55893400 |
| Al | 2.12551200  | 0.00000000  | 1.13403300 |
| F  | -1.53193700 | 1.14827600  | 5.43023500 |
| B  | -1.21844500 | 0.00000000  | 4.84266000 |
| F  | -1.53193700 | -1.14827600 | 5.43023500 |
| F  | 0.23969700  | 0.00000000  | 4.44650400 |
| F  | -1.70133200 | 0.00000000  | 3.41089900 |

Al<sub>3</sub>-BF<sub>4</sub> **4ff** with C<sub>3v</sub> symmetry, 1-A1

|    |            |            |            |
|----|------------|------------|------------|
| Al | 0.00000000 | 0.00000000 | 0.00000000 |
| Al | 0.00000000 | 0.00000000 | 2.72492500 |
| Al | 2.35985400 | 0.00000000 | 1.36246200 |
| F  | 0.12332900 | 2.10959700 | 2.51131200 |

|   |            |            |            |
|---|------------|------------|------------|
| F | 2.11319600 | 2.10959700 | 1.36246200 |
| F | 0.12332900 | 2.10959700 | 0.21361200 |
| B | 0.78661800 | 2.66069900 | 1.36246200 |
| F | 0.78661800 | 3.98882600 | 1.36246200 |

**(2) Al<sub>3</sub>-M compounds**

Al<sub>3</sub>-Li **Ifp** with C<sub>3v</sub> symmetry, 1-A1

|    |             |             |             |
|----|-------------|-------------|-------------|
| Al | 0.00000000  | 1.45053800  | -0.17558500 |
| Al | 1.25620200  | -0.72526900 | -0.17558500 |
| Al | -1.25620200 | -0.72526900 | -0.17558500 |
| Li | 0.00000000  | 0.00000000  | 2.28260800  |

Al<sub>3</sub>-Li **Ipp** with C<sub>2v</sub> symmetry, 1-A

|    |             |            |            |
|----|-------------|------------|------------|
| Al | 0.00000000  | 0.00000000 | 0.00000000 |
| Al | 0.00000000  | 0.00000000 | 2.55990900 |
| Al | 2.11427900  | 0.00000000 | 1.11666000 |
| Li | -1.23896300 | 0.00000000 | 4.90567100 |

Al<sub>3</sub>-FLi<sub>2</sub> **Iifs** with C<sub>s</sub> symmetry, 1-A'

|    |             |            |            |
|----|-------------|------------|------------|
| Al | 0.00000000  | 0.00000000 | 0.00000000 |
| Al | 0.00000000  | 0.00000000 | 2.56930200 |
| Al | 2.12958300  | 0.00000000 | 1.13187700 |
| Li | 0.63742500  | 2.70837000 | 1.37001200 |
| Li | -0.65864600 | 2.45539900 | 3.80851900 |
| F  | -0.05977200 | 3.57859600 | 2.68176000 |

Al<sub>3</sub>-FLi<sub>2</sub> **II23** with C<sub>s</sub> symmetry, 1-A'

|    |             |             |            |
|----|-------------|-------------|------------|
| Al | 0.72620800  | -1.62626800 | 0.00000000 |
| Al | 2.71799700  | 0.11200100  | 0.00000000 |
| Al | -1.79995000 | -1.04826500 | 0.00000000 |
| Li | 0.00000000  | 1.68150100  | 0.00000000 |

|    |             |            |            |
|----|-------------|------------|------------|
| Li | -2.78773800 | 1.57294200 | 0.00000000 |
| F  | -1.44578800 | 2.61662000 | 0.00000000 |

Al<sub>3</sub>-FLi<sub>2</sub> **IIss** with C<sub>s</sub> symmetry, 1-A'

|    |             |             |            |
|----|-------------|-------------|------------|
| Al | 0.72620800  | -1.62626800 | 0.00000000 |
| Al | 2.71799700  | 0.11200100  | 0.00000000 |
| Al | -1.79995000 | -1.04826500 | 0.00000000 |
| Li | 0.00000000  | 1.68150100  | 0.00000000 |
| Li | -2.78773800 | 1.57294200  | 0.00000000 |
| F  | -1.44578800 | 2.61662000  | 0.00000000 |

Al<sub>3</sub>-OLi<sub>3</sub> **III24-1** with C<sub>i</sub> symmetry, 1-A

|    |             |             |             |
|----|-------------|-------------|-------------|
| Al | -0.48540100 | -0.55831800 | -0.63292500 |
| Al | 1.13278300  | 1.36171400  | -0.08674900 |
| Al | 1.83172900  | -1.02077800 | 0.19311500  |
| Li | -0.73431700 | 0.18079300  | 1.77249500  |
| Li | -1.72533200 | 1.85807200  | -0.23136900 |
| Li | -3.07418300 | -1.28452300 | 0.07959800  |
| O  | -1.95336800 | 0.07036700  | 0.24788700  |

Al<sub>3</sub>-OLi<sub>3</sub> **III24-2** with C<sub>s</sub> symmetry, 1-A'

|    |             |             |             |
|----|-------------|-------------|-------------|
| Al | 1.49055400  | -0.91016900 | 0.00000000  |
| Al | 0.63650500  | 1.45484900  | 0.00000000  |
| Al | -0.49670400 | -2.34871300 | 0.00000000  |
| Li | -1.17898900 | 0.13187000  | 1.26390400  |
| Li | -1.17898900 | 0.13187000  | -1.26390400 |
| Li | -1.56292300 | 3.28946700  | 0.00000000  |
| O  | -1.17898900 | 1.59910000  | 0.00000000  |

Al<sub>3</sub>-OLi<sub>3</sub> **IIIfs** with C<sub>s</sub> symmetry, 1-A'

|    |            |            |            |
|----|------------|------------|------------|
| Al | 0.00000000 | 0.00000000 | 0.00000000 |
| Al | 0.00000000 | 0.00000000 | 2.42820600 |
| Al | 2.24808600 | 0.00000000 | 1.21410300 |
| Li | 0.91226000 | 2.71836100 | 1.21410300 |
| Li | 3.49890400 | 2.58042900 | 1.21410300 |
| O  | 2.28332400 | 3.81490300 | 1.21410300 |
| Li | 2.29645600 | 5.48559600 | 1.21410300 |

Al<sub>3</sub>-NLi<sub>4</sub> **IV24** with C<sub>s</sub> symmetry, 1-A'

|    |            |             |            |
|----|------------|-------------|------------|
| Al | 0.00000000 | 0.00000000  | 0.00000000 |
| Al | 0.00000000 | 0.00000000  | 2.61586900 |
| Al | 2.22252000 | 0.00000000  | 1.34916200 |
| Li | 4.41300800 | 0.00000000  | 3.09435900 |
| N  | 2.56149600 | 0.00000000  | 3.25455200 |
| Li | 1.70706800 | 0.00000000  | 4.97906700 |
| Li | 1.88396900 | -1.91609000 | 3.01698200 |
| Li | 1.88396900 | 1.91609000  | 3.01698200 |

Al<sub>3</sub>-NLi<sub>4</sub> **IVfs** with C<sub>s</sub> symmetry, 1-A'

|    |             |             |             |
|----|-------------|-------------|-------------|
| N  | -0.17173500 | 2.82849300  | 0.00000000  |
| Li | -0.94260800 | 1.13806400  | 0.00000000  |
| Li | -0.59183200 | 3.70240400  | 1.51400400  |
| Li | 1.55517300  | 2.19713500  | 0.00000000  |
| Li | -0.59183200 | 3.70240400  | -1.51400400 |
| Al | -0.59183200 | -1.67997400 | -1.21513100 |
| Al | -0.59183200 | -1.67997400 | 1.21513100  |
| Al | 1.40792800  | -0.64155000 | 0.00000000  |

(3) Al<sub>3</sub>-BF<sub>4</sub> (**4ps**) and Al<sub>3</sub>-NLi<sub>4</sub> (**IV24**) compounds in solvents

Al<sub>3</sub>-BF<sub>4</sub> **4ps** with C<sub>2v</sub> symmetry in ethanol solvent, 1-A1

|    |             |             |             |
|----|-------------|-------------|-------------|
| Al | 0.00000000  | 1.21188100  | 2.77884600  |
| Al | 0.00000000  | 0.00000000  | 0.52215500  |
| Al | 0.00000000  | -1.21188100 | 2.77884600  |
| F  | -1.14520700 | 0.00000000  | -2.75877500 |
| B  | 0.00000000  | 0.00000000  | -2.07192100 |
| F  | 1.14520700  | 0.00000000  | -2.75877500 |
| F  | 0.00000000  | -1.09783600 | -1.05669200 |
| F  | 0.00000000  | 1.09783600  | -1.05669200 |

Al<sub>3</sub>-BF<sub>4</sub> **4ps** with C<sub>2v</sub> symmetry in cyclohexane solvent, 1-A1

|    |             |             |             |
|----|-------------|-------------|-------------|
| Al | 0.00000000  | 1.20776800  | 2.77085300  |
| Al | 0.00000000  | 0.00000000  | 0.51420700  |
| Al | 0.00000000  | -1.20776800 | 2.77085300  |
| F  | -1.14674100 | 0.00000000  | -2.75048100 |
| B  | 0.00000000  | 0.00000000  | -2.07561000 |
| F  | 1.14674100  | 0.00000000  | -2.75048100 |
| F  | 0.00000000  | -1.09908500 | -1.04667600 |
| F  | 0.00000000  | 1.09908500  | -1.04667600 |

Al<sub>3</sub>-NLi<sub>4</sub> **IV24** with C<sub>s</sub> symmetry in ethanol solvent, 1-A'

|    |             |             |             |
|----|-------------|-------------|-------------|
| Al | -0.16960200 | 2.38817100  | 0.00000000  |
| Al | 0.03636800  | 0.15948800  | 1.25057800  |
| Al | 0.03636800  | 0.15948800  | -1.25057800 |
| Li | 0.03636800  | -2.79792700 | -1.40915300 |
| N  | 0.09216700  | -1.35276200 | 0.00000000  |
| Li | 0.03636800  | -2.79792700 | 1.40915300  |
| Li | -2.04909900 | -1.47314700 | 0.00000000  |
| Li | 2.18105700  | -1.50552200 | 0.00000000  |

Al<sub>3</sub>-NLi<sub>4</sub> **IV24** with C<sub>s</sub> symmetry in cyclohexane solvent, 1-A'



|    |             |             |             |
|----|-------------|-------------|-------------|
| Al | -0.21504700 | 2.34030900  | 0.00000000  |
| Al | 0.05373100  | 0.08622100  | 1.25962600  |
| Al | 0.05373100  | 0.08622100  | -1.25962600 |
| Li | 0.05373100  | -2.64529800 | -1.58908500 |
| N  | 0.10961600  | -1.56509600 | 0.00000000  |
| Li | 0.05373100  | -2.64529800 | 1.58908500  |
| Li | -2.03728200 | -0.93574700 | 0.00000000  |
| Li | 2.14024600  | -1.01035500 | 0.00000000  |
